# Supplementary material
Source: MDPI journal article supplement (https://www.mdpi.com/1996-1073/13/23/6472)

Supplementary information

# High channel density ceramic microchannel reactor for syngas production

Estelle le Saché<sup>1</sup>, Panayiotis Tsaousis<sup>2</sup>, Tomas Ramirez Reina<sup>1,\*</sup>, Enrique Ruiz-Trejo<sup>2,\*</sup>

<sup>1</sup> Faculty of Engineering & Physical Sciences, Chemical & Process Engineering Department, University of Surrey, Guildford, GU2 7XH, UK; estelle.lesache@surrey.ac.uk (E.I.S.)

<sup>2</sup> Smart Separations Ltd, The Technology Centre Surrey Research Park, Guildford, GU2 7YG, UK; p.tsaousis@smartseparations.com (P.T.)

\* Correspondence: e.ruiz-trejo@imperial.ac.uk (E.R.T.); t.ramirezreina@surrey.ac.uk; Tel.: +44-148-368-6597 (T.R.R.)

## Calculation details:

The effective area of the alumina MCR  $Area_{MCR}$ , the number of channels  $n_{channels}$ , the inner surface  $S_{in}$  and the specific inner surface per volume  $Ss_V$  was determined as follows:

$$Area_{MCR} = \frac{\pi d_{MCR}^2}{4}$$

$$n_{channels} = Area_{MCR} \times C_{channels}$$

$$S_{in} = n_{channels} \times \pi d_{channel} \times h$$

$$Ss_V = \frac{S_{in}}{Area_{MCR} h}$$

With  $d_{MCR}$  the diameter of the MCR,  $C_{channels}$  the concentration of channel per surface area and  $h$  the height of the MCR.

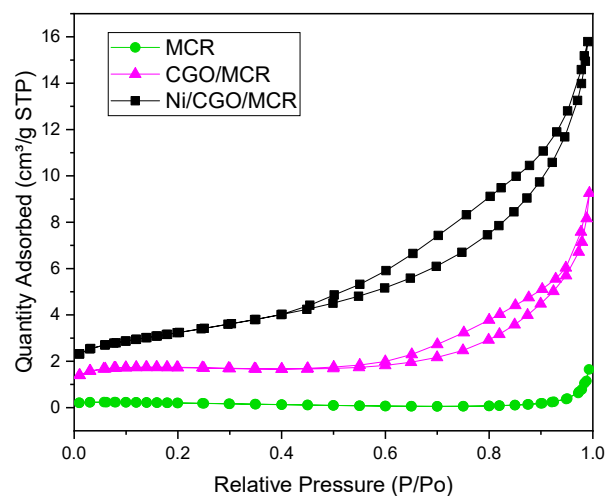

Figure S1. N<sub>2</sub> adsorption-desorption isotherms of MCR, CGO/MCR and Ni/CGO/MCR.

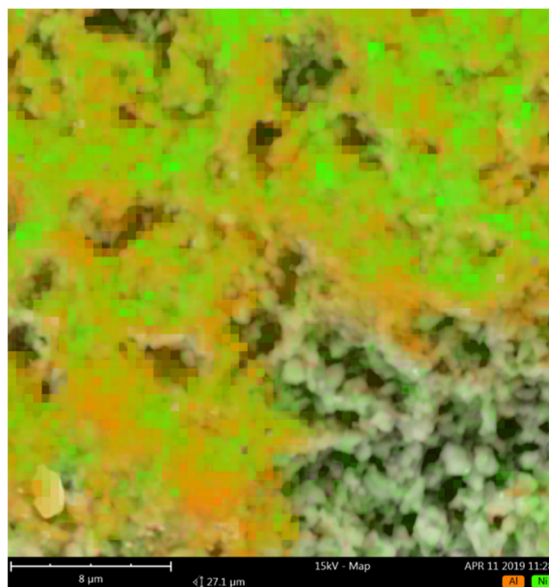

Figure S2. SEM-EDX mapping of Ni/MCR in powder.

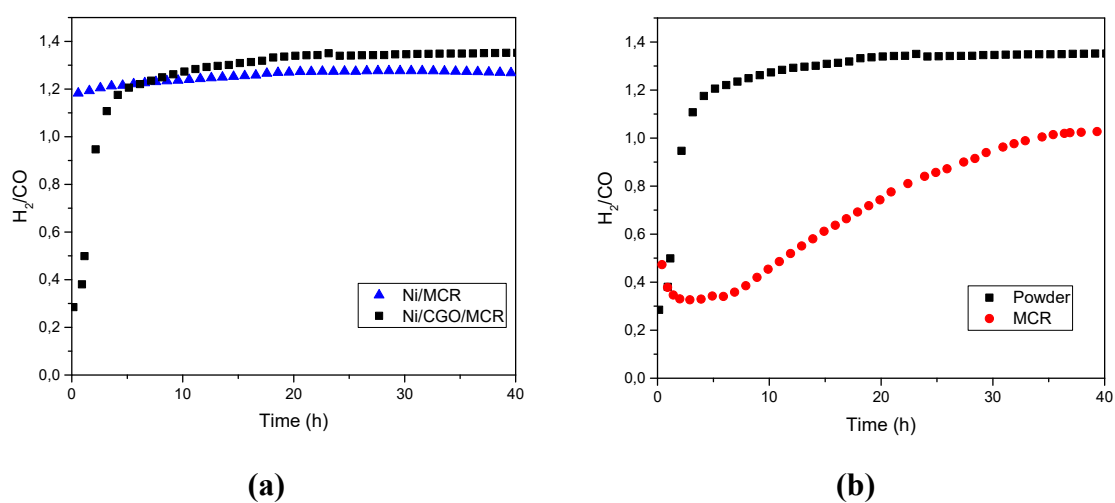

Figure S3. Products distribution for (a) Ni/MCR and Ni/CGO/MCR in powder form and (b) Ni/CGO/MCR in powder and MCR form.

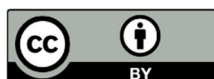

Supplement: s1 [file s1]
